# Supplementary material for: Assembling anionic Sb(v)/(iii) containing polyoxostibonates stabilized by triphenyltellurium cations
Source: Royal Society of Chemistry journal article supplement (doi:10.1039/c4dt03319a), 2014-11-26
Supplement: c4dt03319a1.pdf [file c4dt03319a1.pdf]

# Assembling Anionic Sb(V)/(III) containing polyoxostibonates stabilized by triphenyltellurium cations

Nagarjuna Kumar Srungavruksham and Viswanathan Baskar\*

School of Chemistry, University of Hyderabad, Hyderabad 500046, A.P., India. Tel: 91-40-23134825; E-mail: [vbsc@uohyd.ernet.in](mailto:vbsc@uohyd.ernet.in)

## Supporting information:

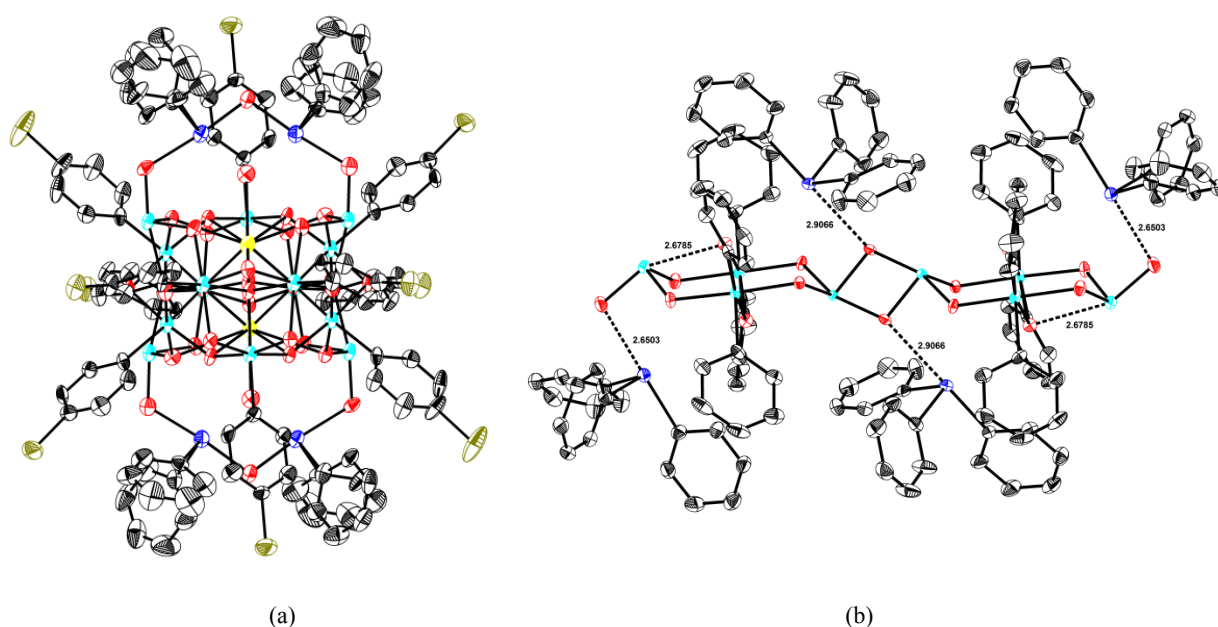

Figure S1: ORTEP representations of **1**(a) and **2**(b). Thermal ellipsoids are shown at 50% probability. Triphenyl tellurium cations, dichloromethane solvates in **1** and hydrogen atoms in **1** and **2** were omitted for clarity.

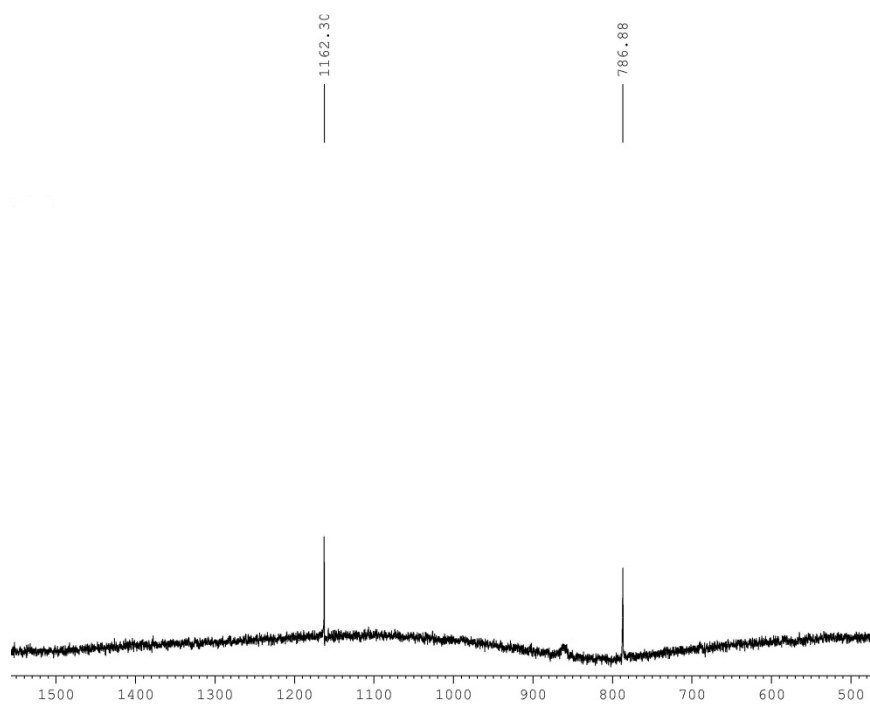

Figure s2: Solution  $^{125}\text{Te}$  NMR spectrum of **1** in  $\text{CDCl}_3$ .

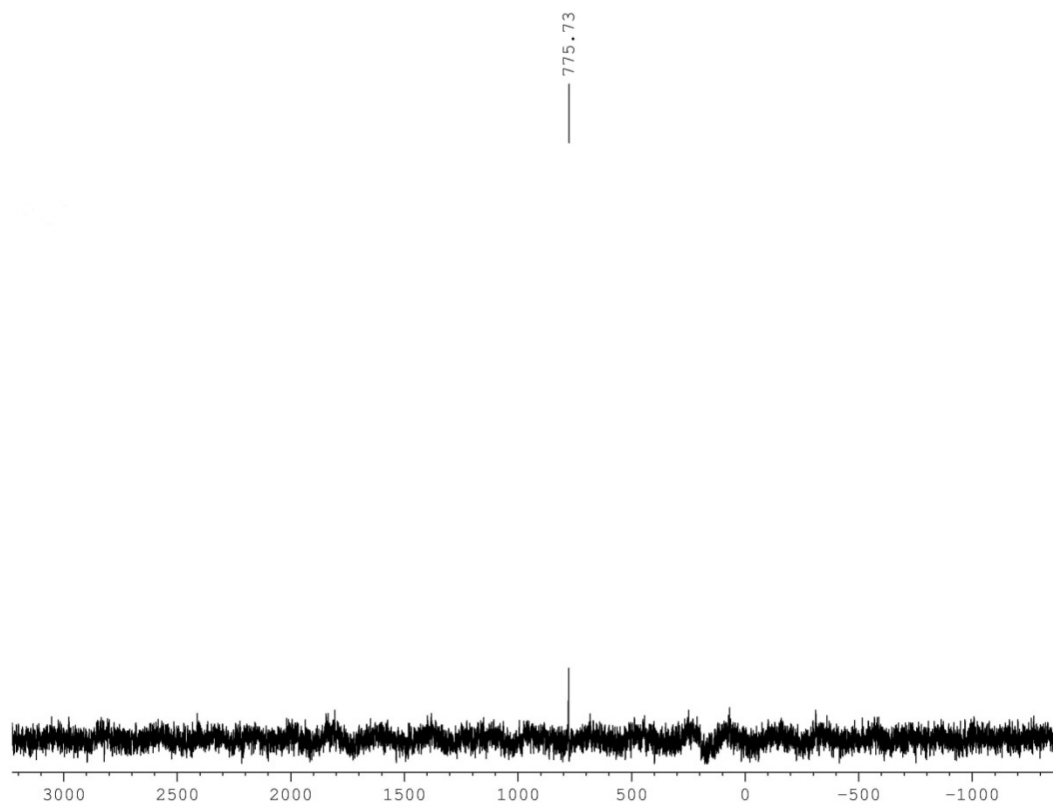

Figure s3: Solution  $^{125}\text{Te}$  NMR spectrum of **2** in  $\text{CD}_3\text{OD}-\text{CD}_2\text{Cl}_2$  mixture.

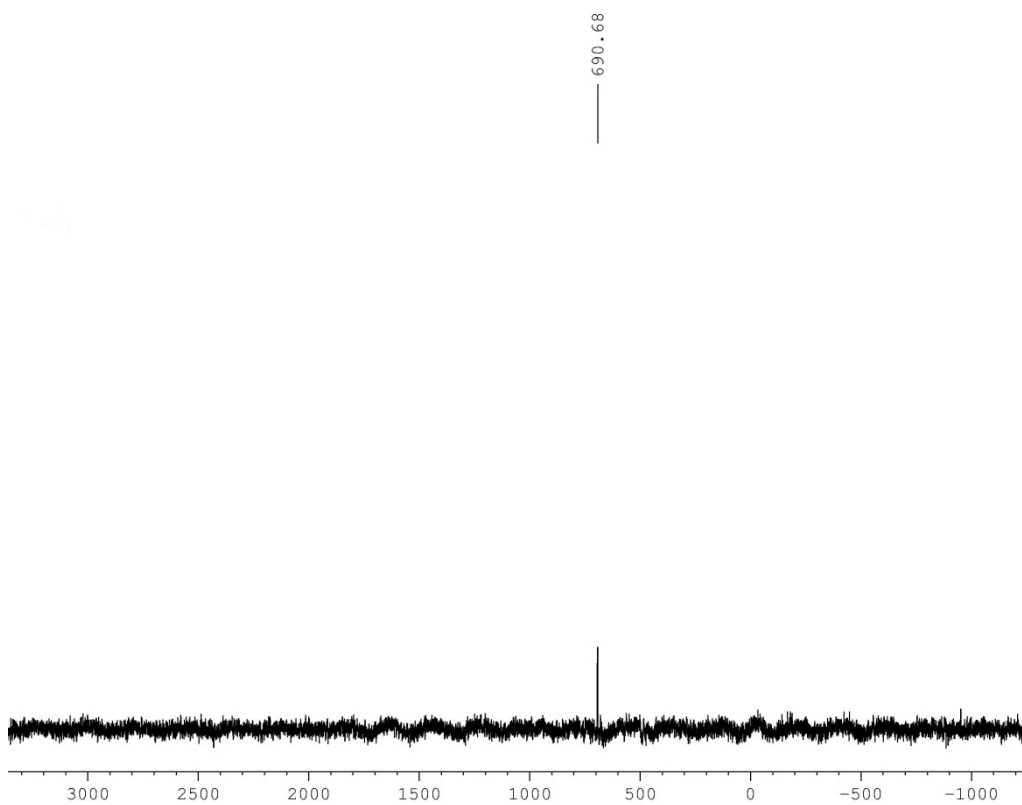

Figure s4: Solution  $^{125}\text{Te}$  NMR spectrum of the filtrate (in reaction 2, diphenyltelluride) in  $\text{CDCl}_3$ .

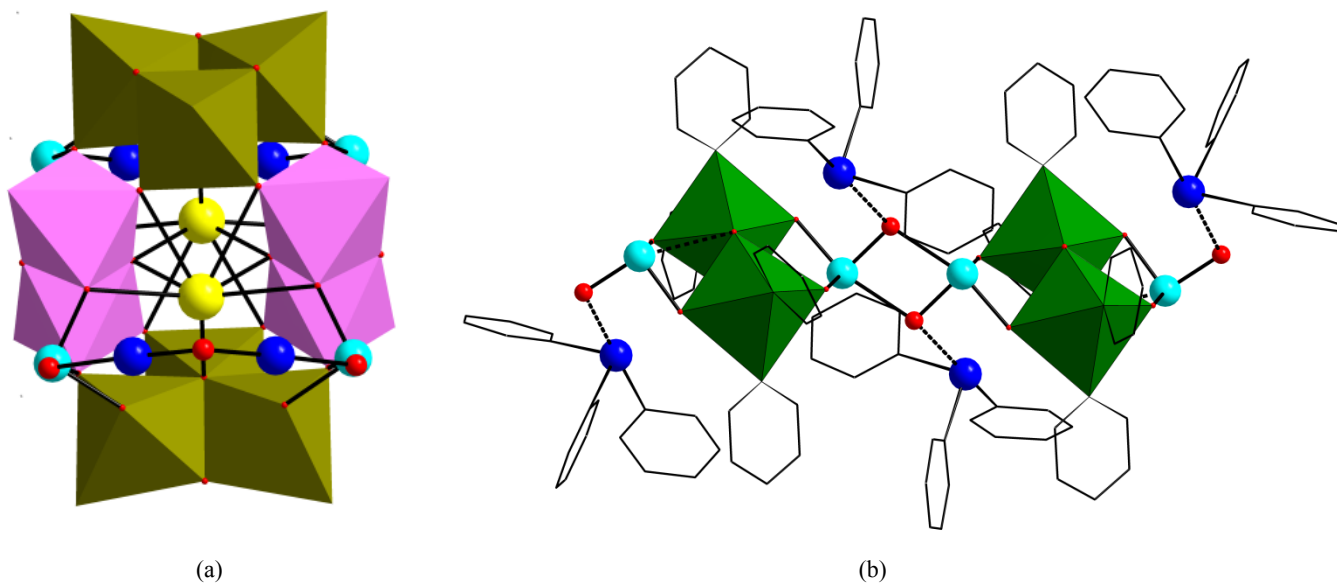

Figure s5: (a) Polyhedral view of **1**. Aryl groups attached to Sb/Te and triphenyl tellurium cations are omitted for clarity. (b) Polyhedral view of **2**.

Table 1: Crystallographic data for **1-2**

|                                              | <b>1</b>                                                                                                                            | <b>2</b>                                                                          |
|----------------------------------------------|-------------------------------------------------------------------------------------------------------------------------------------|-----------------------------------------------------------------------------------|
| Formulae                                     | C <sub>148</sub> H <sub>126</sub> Br <sub>10</sub> Cl <sub>8</sub> Na <sub>2</sub> O <sub>36</sub> Sb <sub>14</sub> Te <sub>6</sub> | C <sub>120</sub> H <sub>104</sub> O <sub>16</sub> Sb <sub>8</sub> Te <sub>4</sub> |
| Fw.g mol <sup>-1</sup>                       | 6079.27                                                                                                                             | 3286.43                                                                           |
| Crystsyst                                    | Monoclinic                                                                                                                          | Monoclinic                                                                        |
| Cryst size.mm                                | 0.16 x 0.12 x 0.08                                                                                                                  | 0.22 x 0.14 x 0.08                                                                |
| Space group                                  | P2(1)/n                                                                                                                             | P2(1)/n                                                                           |
| a, Å                                         | 19.1789(13)                                                                                                                         | 16.709(2)                                                                         |
| b, Å                                         | 22.2219(15)                                                                                                                         | 16.711(2)                                                                         |
| c, Å                                         | 20.1740(13)                                                                                                                         | 19.386(2)                                                                         |
| α, deg                                       | 90                                                                                                                                  | 90                                                                                |
| β, deg                                       | 91.9930(10)                                                                                                                         | 90.193(2)                                                                         |
| γ, deg                                       | 90                                                                                                                                  | 90                                                                                |
| v, Å <sup>3</sup>                            | 8592.8(10)                                                                                                                          | 5413.0(11)                                                                        |
| Z                                            | 2                                                                                                                                   | 2                                                                                 |
| DcaclD.Mgm <sup>-3</sup>                     | 2.350                                                                                                                               | 2.016                                                                             |
| T.K                                          | 100                                                                                                                                 | 100                                                                               |
| μ, mm <sup>-1</sup>                          | 5.685                                                                                                                               | 3.087                                                                             |
| F(000)                                       | 5672                                                                                                                                | 3136                                                                              |
| θ range,deg                                  | 1.36 to 25.07                                                                                                                       | 1.61 to 26.49                                                                     |
| index ranges                                 | -22<=h<=22<br>-26<=k<=26<br>-24<=l<=24                                                                                              | -20<=h<=20<br>-20<=k<=20<br>-24<=l<=24                                            |
| no. of.reflncolled                           | 82138                                                                                                                               | 56992                                                                             |
| completeness to θ max                        | 99.8 %                                                                                                                              | 99.7 %                                                                            |
| no. of. indeprefln/R <sub>int</sub>          | 15219                                                                                                                               | 11162                                                                             |
| GooF(F <sup>2</sup> )                        | 1.030                                                                                                                               | 1.123                                                                             |
| R <sub>1</sub> (F) (I>2σ(I) )                | 0.0554                                                                                                                              | 0.0442                                                                            |
| wR <sub>2</sub> (F <sup>2</sup> ) (All data) | 0.1503                                                                                                                              | 0.1061                                                                            |
| largest diff peak/hole,e Å <sup>-3</sup>     | 2.897/ -1.861                                                                                                                       | 2.802/ -1.824                                                                     |

Table 2: Selected bond lengths(Å) and bond angles(°) in **1**

|                     |                     |                      |                         |
|---------------------|---------------------|----------------------|-------------------------|
| Sb1-O5 = 2.186(7)   | Sb4-O14* = 2.091(7) | Te1-O15 = 2.175(8)   | C7-Sb2-O5 = 168.3(3)    |
| Sb1-O1 = 1.966(6)   | Sb5-O1* = 1.962(7)  | Te2-O16 = 2.258(8)   | C7-Sb2-O10* = 99.8(3)   |
| Sb1-O2 = 1.984(7)   | Sb5-O11 = 2.080(7)  | Te1-O17 = 2.053(8)   | O2-Sb2-O13 = 167.8(3)   |
| Sb1-O4 = 1.996(6)   | Sb5-O10 = 2.004(7)  | Te2-O17 = 2.008(8)   | C13-Sb3-O5 = 170.7(3)   |
| Sb1-O6 = 1.946(7)   | Sb5-O7 = 1.977(6)   | Te1-C31 = 2.128(12)  | O4-Sb3-O12 = 169.8(3)   |
| Sb2-O2 = 1.955(7)   | Sb5-O9 = 1.993(7)   | Te2-C43 = 2.131(13)  | C19-Sb4-O7 = 171.6(3)   |
| Sb2-O3 = 1.981(7)   | Sb6-O8 = 2.504(7)   | Te3-C55 = 2.112(11)  | C25-Sb5-O7 = 169.0(3)   |
| Sb2-O5 = 2.081(7)   | Sb6-O12 = 1.906(7)  | C4-Br1 = 1.895(11)   | O1*-Sb5-O9 = 168.0(3)   |
| Sb2-O10* = 2.006(7) | Sb6-O11 = 1.871(7)  | Na1-O1 = 2.912(8)    | O12-Sb6-O11 = 97.2(3)   |
| Sb2-O13 = 2.039(7)  | Sb6-O16 = 1.865(7)  | Na1-O5 = 2.379(8)    | O8-Sb6-O16 = 165.8(3)   |
| Sb3-O3 = 1.978(7)   | Sb7-O10* = 2.428(7) | Na1-O7 = 2.355(9)    | O12-Sb6-O16 = 95.8(3)   |
| Sb3-O5 = 2.088(6)   | Sb7-O13 = 1.915(7)  | Na1-O7* = 2.359(8)   | O15-Sb7-O10* = 164.5(3) |
| Sb3-O4 = 1.969(7)   | Sb7-O14 = 1.849(7)  | Na1-O6* = 2.962(7)   | Na1-O7-Na1* = 95.9(3)   |
| Sb3-O12 = 2.044(7)  | Sb7-O15 = 1.875(8)  | Na1-O14 = 2.851(8)   | Te1-O17-Te2 = 107.6(4)  |
| Sb3-O8 = 1.984(7)   | Sb1-C1 = 2.119(11)  | Na1-O18 = 2.494(9)   | Te2-O16-Sb6 = 117.8(3)  |
| Sb4-O6 = 1.962(7)   | Sb2-C7 = 2.109(11)  | Na1-O11 = 2.779(8)   | Te1-O15-Sb7 = 118.2(4)  |
| Sb4-O8 = 2.017(7)   | Sb3-C13 = 2.120(10) | C1-Sb1-O5 = 173.9(3) | Sb4*-O14-Sb7 = 131.8(4) |
| Sb4-O9 = 1.980(6)   | Sb4-C19 = 2.102(10) | C1-Sb1-O1 = 94.0(3)  | Sb7*-O10-Sb2* = 94.5(3) |
| Sb4-O7 = 1.996(7)   | Sb5-C25 = 2.097(11) | O6-Sb1-O2 = 167.3(3) | Sb5-O11-Sb6 = 131.6(4)  |

Symmetry transformations used to generate equivalent atoms: \*=-x+1,-y,-z+1

Table 3: Selected bond lengths(Å) and bond angles(°) in **2**

|                   |                    |                         |                          |
|-------------------|--------------------|-------------------------|--------------------------|
| Sb1-O6 = 2.003(4) | Sb4-O5 = 1.871(4)  | C1-Sb1-O8 = 164.6(2)    | O5-Sb4-O6 = 88.28(17)    |
| Sb1-O1 = 2.072(4) | Sb4-O6 = 1.943(4)  | C7-Sb1-O1 = 93.0(2)     | O6-Sb4-O5* = 164.37(15)  |
| Sb1-O7 = 2.019(4) | Sb4-O4 = 1.906(4)  | O7-Sb1-O8 = 78.89(16)   | O4-Sb4-O6 = 97.49(16)    |
| Sb1-O8 = 2.038(4) | Sb4-O5* = 2.361(4) | O1-Sb2-O2 = 95.1(2)     | Sb1-O8-Sb3 = 99.81(17)   |
| Sb2-O1 = 1.886(4) | Sb1-C1 = 2.143(6)  | O1-Sb2-O3 = 102.79(18)  | Sb1-O1-Sb2 = 116.9(2)    |
| Sb2-O2 = 1.842(4) | Sb1-C7 = 2.150(6)  | O2-Sb2-O3 = 94.83(19)   | Sb3-O4-Sb4 = 120.26(19)  |
| Sb2-O3 = 1.901(4) | Sb3-C13 = 2.149(6) | C13-Sb3-O8 = 167.18(19) | Sb4-O5-Sb4* = 130.69(17) |
| Sb3-O3 = 2.081(4) | Sb3-C19 = 2.141(6) | C19-Sb3-O7 = 169.3(2)   |                          |
| Sb3-O4 = 2.059(4) | Te1-C25 = 2.134(6) | C13-Sb3-O4 = 94.89(19)  |                          |

|                   |                      |                       |  |
|-------------------|----------------------|-----------------------|--|
| Sb3-O7 = 1.998(4) | Te1-C43 = 2.124(6)   | O3-Sb3-O7 = 91.83(17) |  |
| Sb3-O8 = 2.025(4) | C1-Sb1-O7 = 167.9(2) | O4-Sb4-O5 = 96.66(17) |  |

Symmetry transformations used to generate equivalent atoms: \* = -x, -y+1, -z+1
